# Supplementary material
Source: publisher figshare collection journal article supplement (https://gsajournals.figshare.com/ndownloader/files/15090254)
Supplement: Supplementary file 1 [file 15090254]

## Sheet: Sheet1
File S1. Interaction partners of VE-1::sGFP fusion in veAD strain of in A. nidulans
Accession	Description	Score	Coverage	# Proteins	# Unique Peptides	# Peptides	# PSMs	# AAs	MW [kDa]	calc. pI
NCU01731T0	NCU01731 | Neurospora crassa OR74A velvetA-like-1 (555 aa)	128.658	48.38	1	21	21	39	554	61.5503	8.93896
AN1296	AN1296 AspGDID:ASPL0000057174 COORDS:ChrVIII_A_nidulans_FGSC_A4:921015-918535C, translated using codon table 1 (826 amino acids) Uncharacterized ORF; Ortholog(s) have 2',3'-cyclic-nucleotide 3'-phosphodiesterase activity, GTP-dependent polyribonucleotide 5'-hydroxyl-kinase activity, RNA ligase (ATP) activity	24.9849	18.77	1	13	13	13	826	93.1564	7.78174
AN7570	tubB AspGDID:ASPL0000065841 COORDS:ChrIV_A_nidulans_FGSC_A4:1979601-1977747C, translated using codon table 1 (451 amino acids) Verified ORF; Alpha-tubulin, forms a heterodimer with beta-tubulin that promotes microtubule assembly; non-essential subunit required for meiosis and formation of ascospores	22.6074	33.92	2	10	10	11	451	50.0276	5.10986
AN4676	AN4676 AspGDID:ASPL0000071397 COORDS:ChrIII_A_nidulans_FGSC_A4:1342631-1344787W, translated using codon table 1 (662 amino acids) Uncharacterized ORF; Ortholog of <i>A. fumigatus Af293</i> : Afu5g09010, <i>A. niger CBS 513.88</i> : An07g04120, <i>A. oryzae RIB40</i> : AO090020000473, <i>Aspergillus sydowii</i> : Aspsy1_0059438 and <i>Aspergillus terreus NIH2624</i> : ATET_06565	16.3168	16.16	1	10	10	10	662	77.3666	9.26123
AN0807	laeA AspGDID:ASPL0000059499 COORDS:ChrVIII_A_nidulans_FGSC_A4:2423500-2422246C, translated using codon table 1 (374 amino acids) Verified ORF; Methyltransferase-domain protein; velvet complex component composed of VelB, VeA and LaeA; self-methylates; coordinates asexual development in response to light; regulates secondary metabolism and is required for Hulle cell formation	30.1333	37.43	1	9	9	12	374	42.9378	6.39209
AN7291	AN7291 AspGDID:ASPL0000067600 COORDS:ChrIV_A_nidulans_FGSC_A4:400576-399476C, translated using codon table 1 (308 amino acids) Uncharacterized ORF; Ortholog of <i>A. fumigatus Af293</i> : Afu2g16910, <i>A. oryzae RIB40</i> : AO090102000654, <i>Aspergillus wentii</i> : Aspwe1_0171092, <i>Aspergillus sydowii</i> : Aspsy1_0027159 and <i>Aspergillus terreus NIH2624</i> : ATET_10094	28.465	39.61	1	9	9	12	308	35.7204	4.80518
AN10349	AN10349 AspGDID:ASPL0000037847 COORDS:ChrVI_A_nidulans_FGSC_A4:2357671-2359270W, translated using codon table 1 (472 amino acids) Uncharacterized ORF; Has domain(s) with predicted role in mRNA processing	23.9671	13.77	1	8	8	10	472	55.6982	11.7368
AN0289	AN0289 AspGDID:ASPL0000053315 COORDS:ChrVIII_A_nidulans_FGSC_A4:4012795-4015077W, translated using codon table 1 (760 amino acids) Uncharacterized ORF; Ortholog(s) have U2-type spliceosomal complex localization	16.0297	14.34	1	8	8	9	760	87.116	10.2427
AN1990	AN1990 AspGDID:ASPL0000049641 COORDS:ChrVII_A_nidulans_FGSC_A4:2478496-2476884C, translated using codon table 1 (463 amino acids) Uncharacterized ORF; Putative homocitrate synthase with a predicted role in pyruvate metabolism	11.3969	19.22	1	5	5	5	463	50.8294	5.78271
AN4943	AN4943 AspGDID:ASPL0000075677 COORDS:ChrIII_A_nidulans_FGSC_A4:487297-489720W, translated using codon table 1 (807 amino acids) Uncharacterized ORF; Has domain(s) with predicted RNA binding activity and role in RNA processing	6.81174	8.8	1	5	5	5	807	88.2531	5.68115
AN0892	AN0892 AspGDID:ASPL0000060197 COORDS:ChrVIII_A_nidulans_FGSC_A4:2147409-2144778C, translated using codon table 1 (837 amino acids) Uncharacterized ORF; Ortholog of <i>A. fumigatus Af293</i> : Afu1g15460, <i>A. niger CBS 513.88</i> : An01g13900, <i>A. oryzae RIB40</i> : AO090005001665, <i>Aspergillus wentii</i> : Aspwe1_0027562 and <i>Aspergillus sydowii</i> : Aspsy1_0138433	7.61901	7.41	1	4	4	4	837	90.8288	9.78857
AN4060	rps16 AspGDID:ASPL0000016360 COORDS:ChrII_A_nidulans_FGSC_A4:2208339-2207479C, translated using codon table 1 (148 amino acids) Uncharacterized ORF; Putative ribosomal protein S16	4.71038	29.73	1	4	4	5	148	16.4406	8.90967
AN0363	velB AspGDID:ASPL0000062886 COORDS:ChrVIII_A_nidulans_FGSC_A4:3786388-3787657W, translated using codon table 1 (369 amino acids) Verified ORF; Component of the velvet complex composed of VelB, VeA, and LaeA that coordinates development and secondary metabolism in response to light	13.8713	9.49	1	3	3	5	369	40.0147	6.53662
AN0109	AN0109 AspGDID:ASPL0000053720 COORDS:ChrVIII_A_nidulans_FGSC_A4:4586549-4585558C, translated using codon table 1 (254 amino acids) Uncharacterized ORF; Ortholog(s) have U1 snRNP, nucleolus localization	9.98236	23.62	1	3	3	3	254	27.9417	8.98291
AN0734	H4.1 AspGDID:ASPL0000056547 COORDS:ChrVIII_A_nidulans_FGSC_A4:2629659-2629235C, translated using codon table 1 (103 amino acids) Uncharacterized ORF; Histone H4.1, core histone protein; nearly identical to histone H4.2	8.45966	31.07	2	3	3	4	103	11.3494	11.356
AN4494	AN4494 AspGDID:ASPL0000077643 COORDS:ChrIII_A_nidulans_FGSC_A4:1869709-1868649C, translated using codon table 1 (140 amino acids) Uncharacterized ORF; Ortholog(s) have cytosol, mitochondrion, nucleus localization	6.39066	25.71	1	3	3	3	140	14.8299	10.2134
AN3706	AN3706 AspGDID:ASPL0000012467 COORDS:ChrII_A_nidulans_FGSC_A4:3321661-3320973C, translated using codon table 1 (153 amino acids) Uncharacterized ORF; <I>S. cerevisiae</I> ortholog RPS10A has role in rRNA export from nucleus; palA-dependent expression independent of pH	6.19915	19.61	1	3	3	3	153	17.6441	9.81787
AN0092	AN0092 AspGDID:ASPL0000053007 COORDS:ChrVIII_A_nidulans_FGSC_A4:4643455-4645730W, translated using codon table 1 (741 amino acids) Uncharacterized ORF; Putative methyltransferase with a predicted role in histidine metabolism	4.74752	7.96	1	3	3	3	741	83.9207	5.60498
AN3039	AN3039 AspGDID:ASPL0000035292 COORDS:ChrVI_A_nidulans_FGSC_A4:2038563-2037447C, translated using codon table 1 (352 amino acids) Uncharacterized ORF; Ortholog(s) have mitochondrion, nucleus localization	4.58327	11.08	1	3	3	3	352	40.8577	9.37842
AN10681	AN10681 AspGDID:ASPL0000026338 COORDS:ChrV_A_nidulans_FGSC_A4:2652978-2653935W, translated using codon table 1 (122 amino acids) Uncharacterized ORF; Ortholog(s) have structural constituent of ribosome activity, role in cytoplasmic translation, regulation of translational fidelity and cytosolic large ribosomal subunit localization	3.9162	15.57	1	3	3	3	122	13.9276	10.3452
AN1752	AN1752 AspGDID:ASPL0000043602 COORDS:ChrVII_A_nidulans_FGSC_A4:1800474-1797337C, translated using codon table 1 (1045 amino acids) Uncharacterized ORF; Putative sulfite reductase with a predicted role in sulfur metabolism	2.09921	3.44	1	3	3	3	1045	114.721	5.13525
AN1448	AN1448 AspGDID:ASPL0000050893 COORDS:ChrVII_A_nidulans_FGSC_A4:809521-811549W, translated using codon table 1 (653 amino acids) Uncharacterized ORF; Has domain(s) with predicted nucleic acid binding, zinc ion binding activity	1.74036	7.96	1	3	3	3	653	71.1497	8.89502
AN1182	benA AspGDID:ASPL0000060381 COORDS:ChrVIII_A_nidulans_FGSC_A4:1268188-1270053W, translated using codon table 1 (447 amino acids) Verified ORF; Beta-tubulin, highly conserved component of microtubules; <I>A. nidulans</I> has two beta-tubulin genes, benA and tubC; temperature sensitive mutants are blocked in mitosis and in nuclear division	15.9962	7.83	1	2	3	4	447	49.8199	4.89404
AN1319	AN1319 AspGDID:ASPL0000057404 COORDS:ChrVIII_A_nidulans_FGSC_A4:844761-845292W, translated using codon table 1 (126 amino acids) Uncharacterized ORF; Ortholog(s) have RNA binding activity and role in mRNA splicing, via spliceosome, maturation of SSU-rRNA from tricistronic rRNA transcript (SSU-rRNA, 5.8S rRNA, LSU-rRNA)	13.902	30.16	1	2	2	4	126	13.7093	6.53662
AN7177	AN7177 AspGDID:ASPL0000067256 COORDS:ChrIV_A_nidulans_FGSC_A4:767854-768621W, translated using codon table 1 (231 amino acids) Uncharacterized ORF; Ortholog of <i>A. fumigatus Af293</i> : Afu4g03322, <i>A. niger CBS 513.88</i> : An14g01990, <i>A. oryzae RIB40</i> : AO090011000139, <i>Aspergillus sydowii</i> : Aspsy1_0052594 and <i>Aspergillus terreus NIH2624</i> : ATET_02136	9.40088	14.29	1	2	2	3	231	25.877	4.79248
AN11864	AN11864 AspGDID:ASPL0000101064 COORDS:ChrVII_A_nidulans_FGSC_A4:2812163-2812636W, translated using codon table 1 (120 amino acids) Uncharacterized ORF; Protein of unknown function	8.75815	19.17	1	2	2	3	120	13.8689	8.35303
AN3598	fprA AspGDID:ASPL0000009263 COORDS:ChrII_A_nidulans_FGSC_A4:3653822-3654384W, translated using codon table 1 (108 amino acids) Verified ORF; Putative peptidyl-prolyl cis-trans isomerase; FKBP12 homolog; mutant displays reduced growth on 2-pyrrolidone and enhanced growth on threonine	6.59386	33.33	1	2	2	2	108	11.585	7.18115
AN8254	nop10 AspGDID:ASPL0000010487 COORDS:ChrII_A_nidulans_FGSC_A4:1290851-1290413C, translated using codon table 1 (67 amino acids) Uncharacterized ORF; Putative snoRNP complex protein; ortholog of <I>S. cerevisiae</I> Nop10p; expression reduced after exposure to farnesol	5.8202	23.88	1	2	2	2	67	7.72809	9.84717
AN8197	AN8197 AspGDID:ASPL0000009301 COORDS:ChrII_A_nidulans_FGSC_A4:1103071-1101409C, translated using codon table 1 (527 amino acids) Uncharacterized ORF; Ortholog of <i>A. fumigatus Af293</i> : Afu5g03290, <i>A. niger CBS 513.88</i> : An09g05540, <i>A. oryzae RIB40</i> : AO090102000532, <i>Aspergillus wentii</i> : Aspwe1_0115831 and <i>Aspergillus sydowii</i> : Aspsy1_0211779	5.46331	5.5	1	2	2	2	527	58.6764	9.87646
AN4850	AN4850 AspGDID:ASPL0000078120 COORDS:ChrIII_A_nidulans_FGSC_A4:797717-795216C, translated using codon table 1 (712 amino acids) Uncharacterized ORF; Ortholog(s) have nucleus localization	5.00774	4.49	1	2	2	2	712	80.135	9.96436
AN9090	rrmA AspGDID:ASPL0000035772 COORDS:ChrVI_A_nidulans_FGSC_A4:465056-466447W, translated using codon table 1 (393 amino acids) Verified ORF; RNA binding protein involved in regulation of arginine catabolism; controls stability of mRNAs in response to nitrogen sources and oxidative stress	4.28253	5.85	1	2	2	2	393	42.2602	7.29834
AN8276	AN8276 AspGDID:ASPL0000013024 COORDS:ChrII_A_nidulans_FGSC_A4:1356128-1358728W, translated using codon table 1 (720 amino acids) Uncharacterized ORF; Ortholog(s) have protein domain specific binding, transcription regulatory region RNA binding activity	4.25441	4.17	1	2	2	2	720	76.8059	9.68604
AN1282	AN1282 AspGDID:ASPL0000055565 COORDS:ChrVIII_A_nidulans_FGSC_A4:960268-961436W, translated using codon table 1 (347 amino acids) Uncharacterized ORF; Ortholog(s) have protein complex scaffold activity, role in posttranslational protein targeting to membrane, response to heat and TRC complex, nucleus localization	3.83604	8.93	1	2	2	2	347	35.9874	5.04639
AN10736	AN10736 AspGDID:ASPL0000004051 COORDS:ChrI_A_nidulans_FGSC_A4:1994433-1995975W, translated using codon table 1 (473 amino acids) Uncharacterized ORF; Protein of unknown function	2.99237	8.03	1	2	2	2	473	52.3941	10.3452
AN2530	hsp30 AspGDID:ASPL0000049895 COORDS:ChrVII_A_nidulans_FGSC_A4:4245415-4244870C, translated using codon table 1 (181 amino acids) Verified ORF; Heat shock protein 30; expression and protein levels upregulated after exposure to farnesol	2.34553	12.71	1	2	2	2	181	20.2722	6.56592
AN0565	pyrABCN AspGDID:ASPL0000059511 COORDS:ChrVIII_A_nidulans_FGSC_A4:3153608-3160488W, translated using codon table 1 (2256 amino acids) Verified ORF; Multifunctional enzyme with carbamoyl-phosphate synthase (CPSase) and aspartate carbamoyltransferase (ATCase) activities that catalyze the first two steps in pyrimidine biosynthesis	2.19997	1.06	1	2	3	3	2256	247.173	6.354
AN1191	sumO AspGDID:ASPL0000057787 COORDS:ChrVIII_A_nidulans_FGSC_A4:1238284-1237902C, translated using codon table 1 (94 amino acids) Verified ORF; Small ubiquitin-like modifier (SUMO) protein; mutant is viable, slow growing with pleiotropic phenotypes; punctate nucleoplasmic localization at interphase; deletion causes dramatic increase in asperthecin; camptothecin induced transcript	1.78139	19.15	1	2	2	2	94	10.4362	5.03369
